# Supplementary material for: A molecular simulation approach towards the development of universal nanocarriers by studying the pH- and electrostatic-driven changes in the dynamic structure of albumin
Source: Royal Society of Chemistry journal article supplement (doi:10.1039/d0ra00803f), 2020-01-01

## Supporting Information

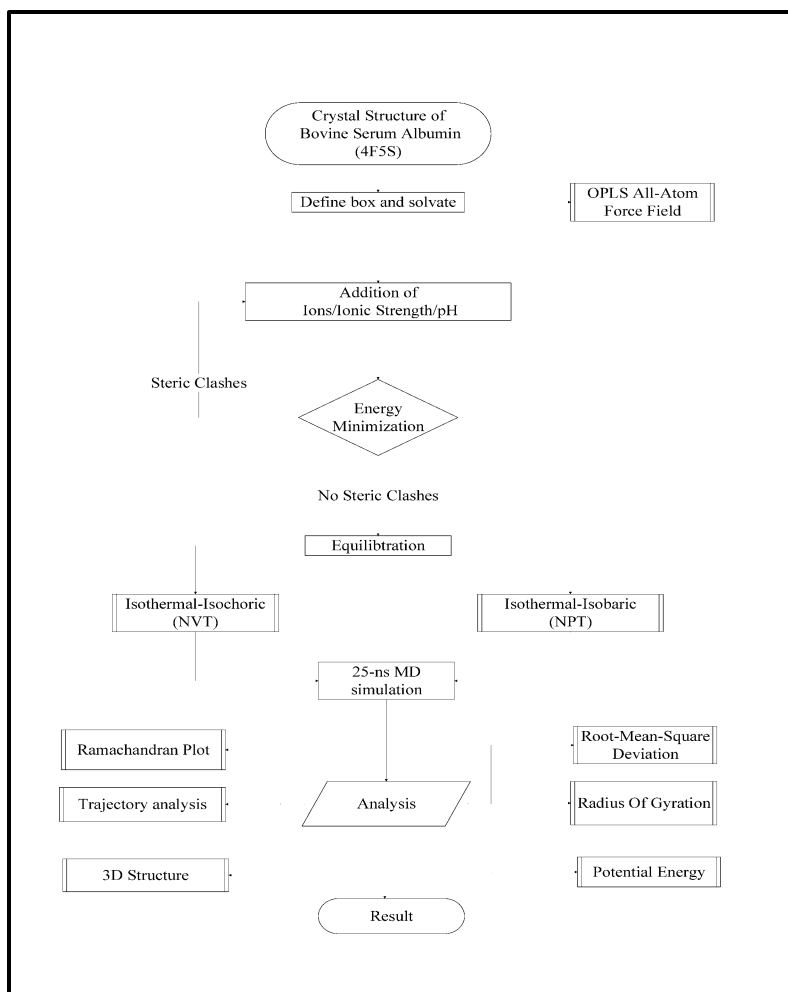

Fig S1: Simulations protocol for the role of protonation state and electrostatic charges on the conformation and dynamics of albumin structure.

Fig S2: 3D structure of BSA (4F5S.pdb)

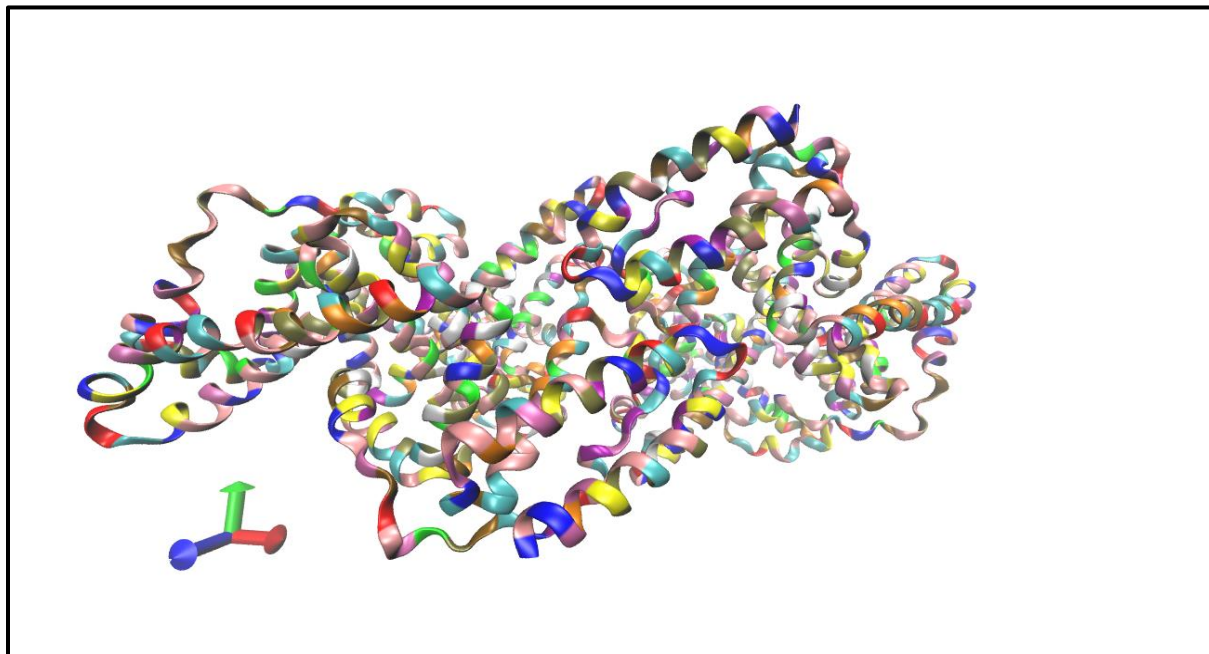

Fig S3: 3D structure of Simulated BSA at 10mM and pH 2

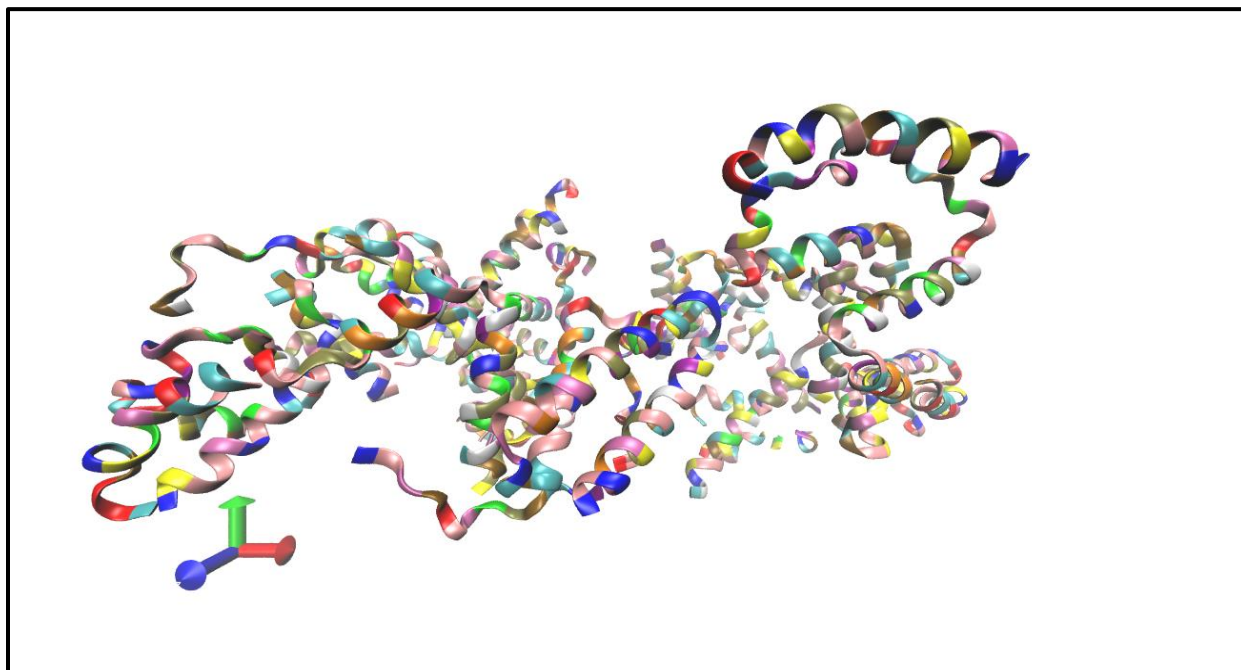

Fig S4: 3D structure of Simulated BSA at 10mM and pH 3.5

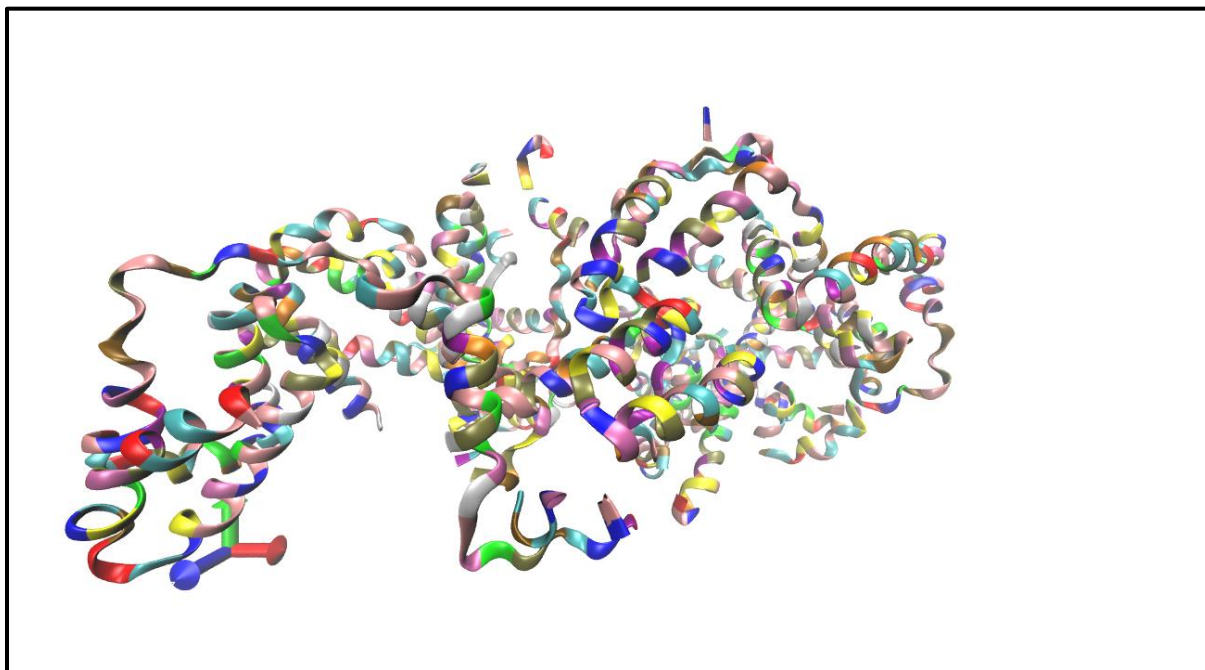

Fig S5: 3D structure of Simulated BSA at 10mM and pH 4.3

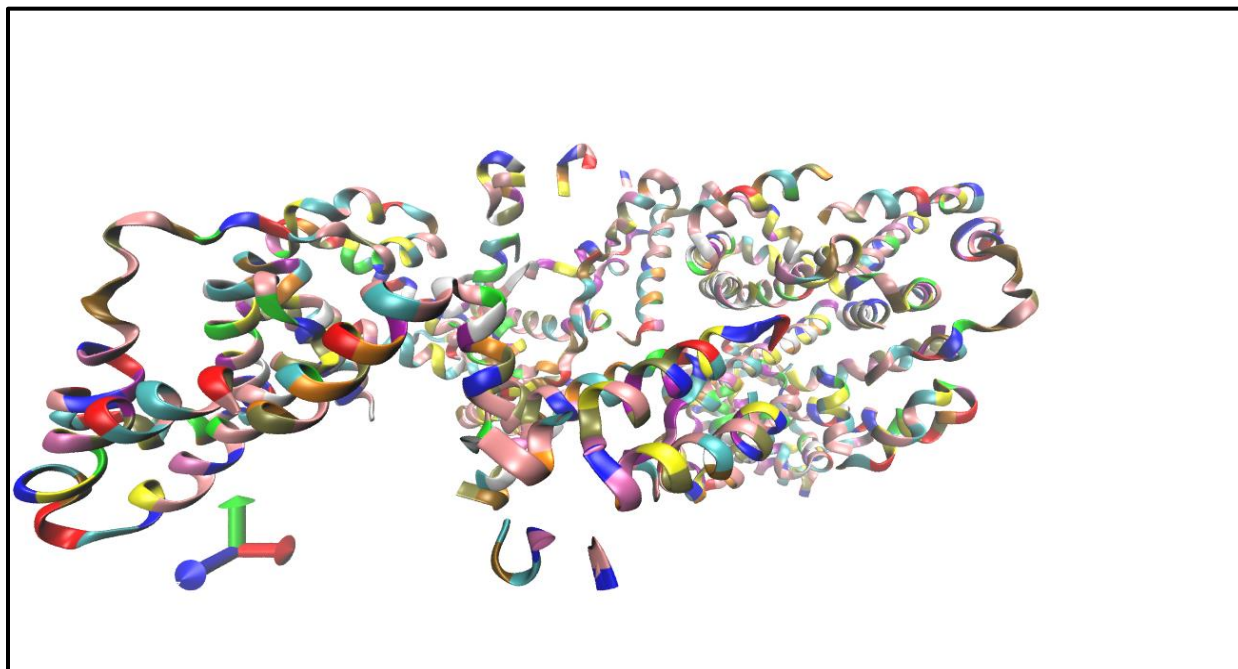

Fig S6: 3D structure of Simulated BSA at 10mM and pH 7.4

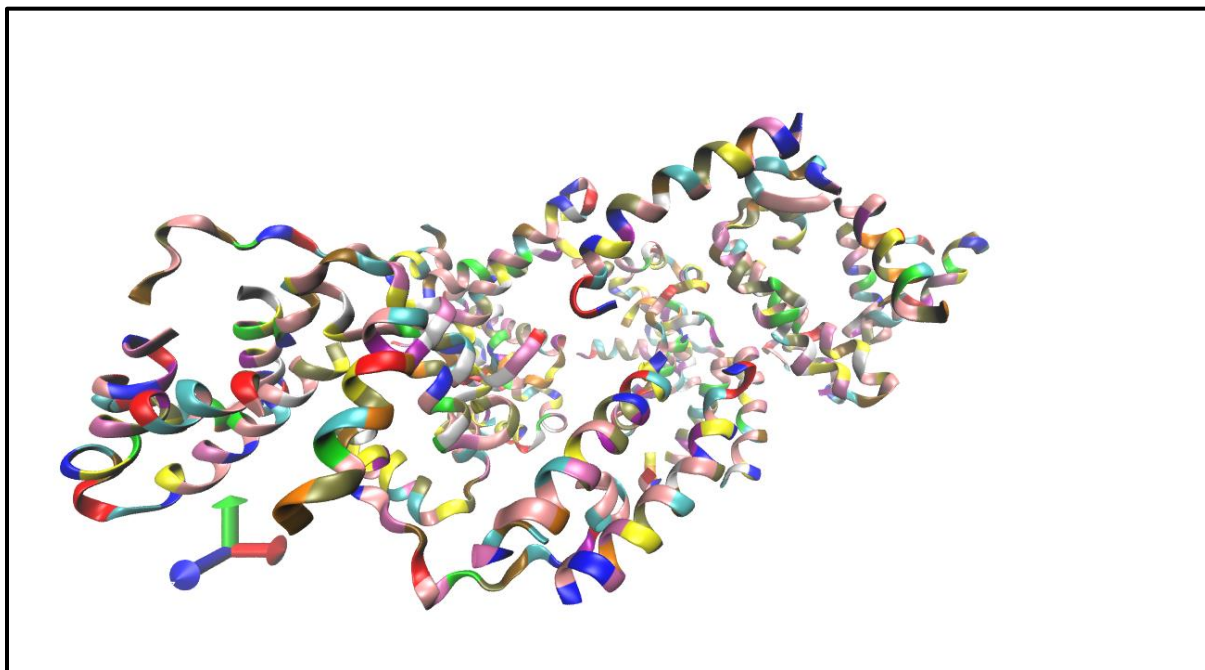

Fig S7: 3D structure of Simulated BSA at 10mM and pH 9.0

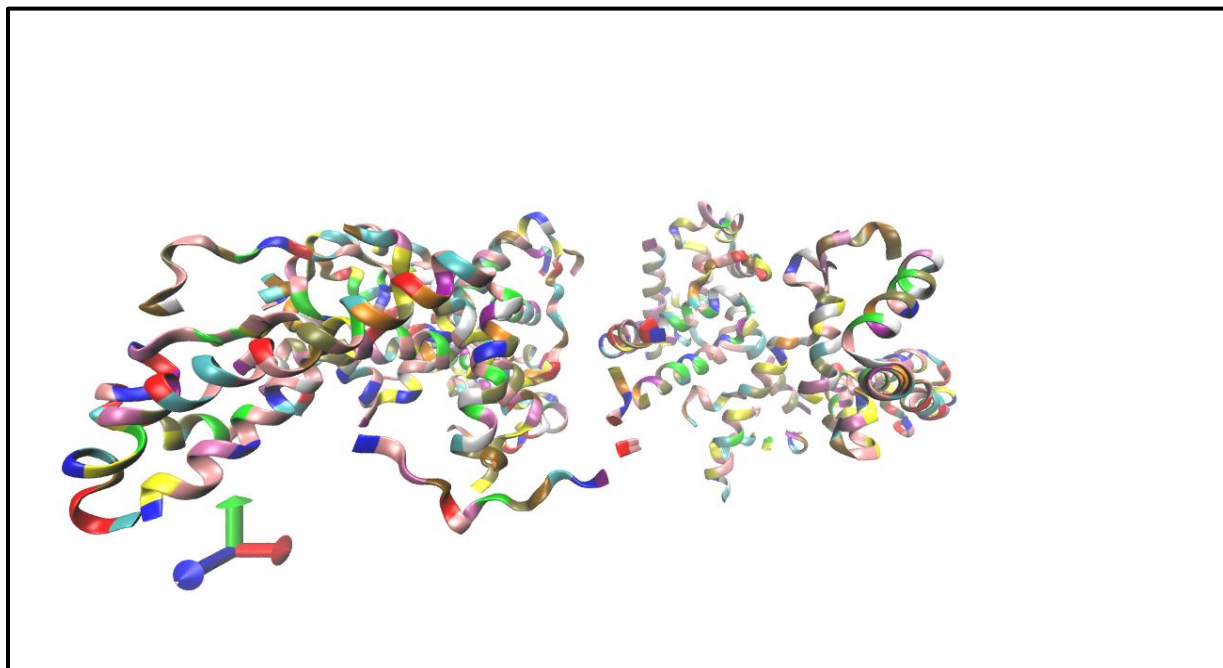

Fig S8: 3D structure of Simulated BSA at 20mM and pH 2.0

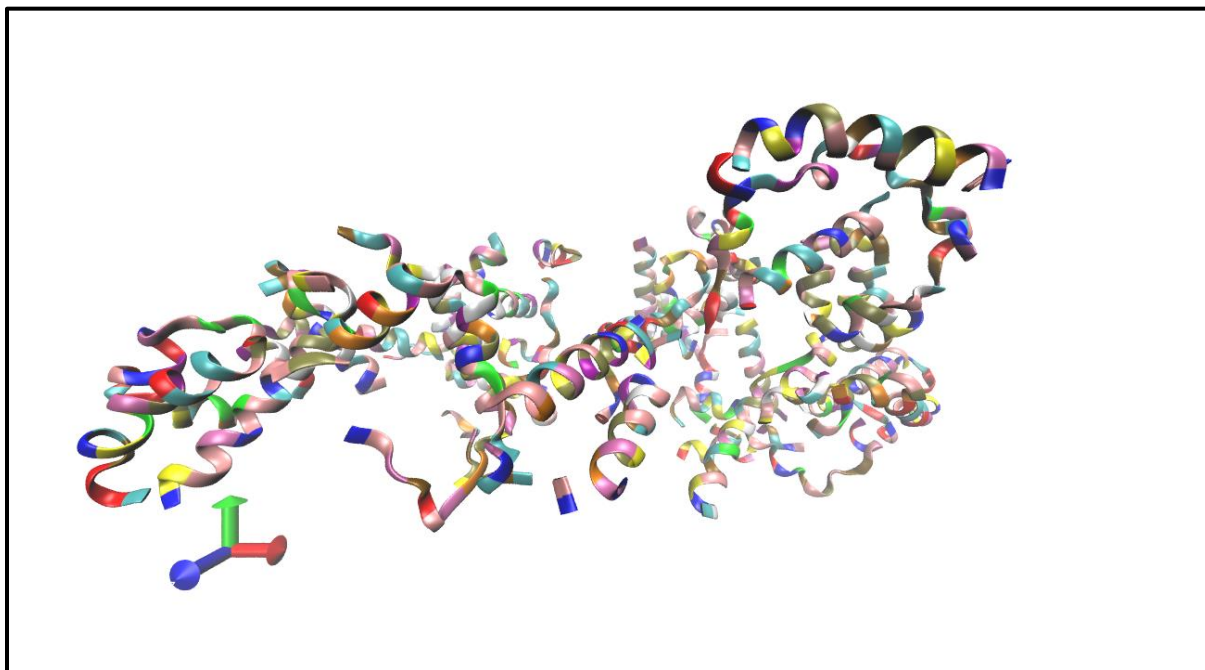

Fig S9: 3D structure of Simulated BSA at 20mM and pH 3.5

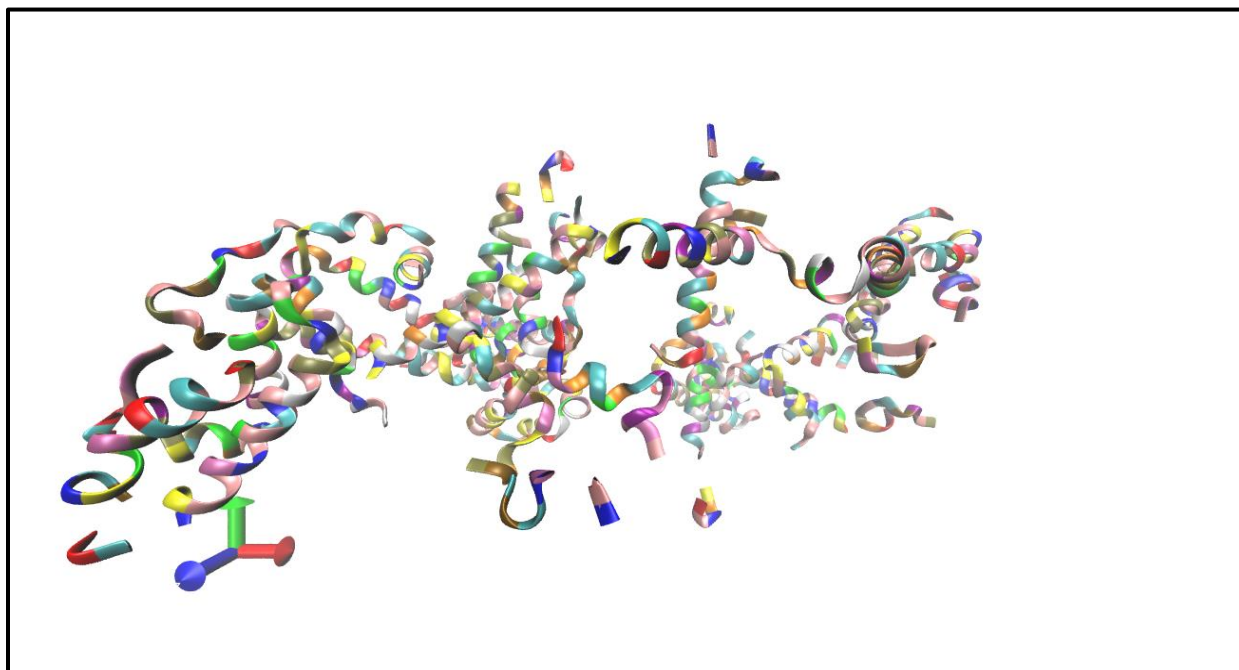



Fig S10: 3D structure of Simulated BSA at 20mM and pH 4.3

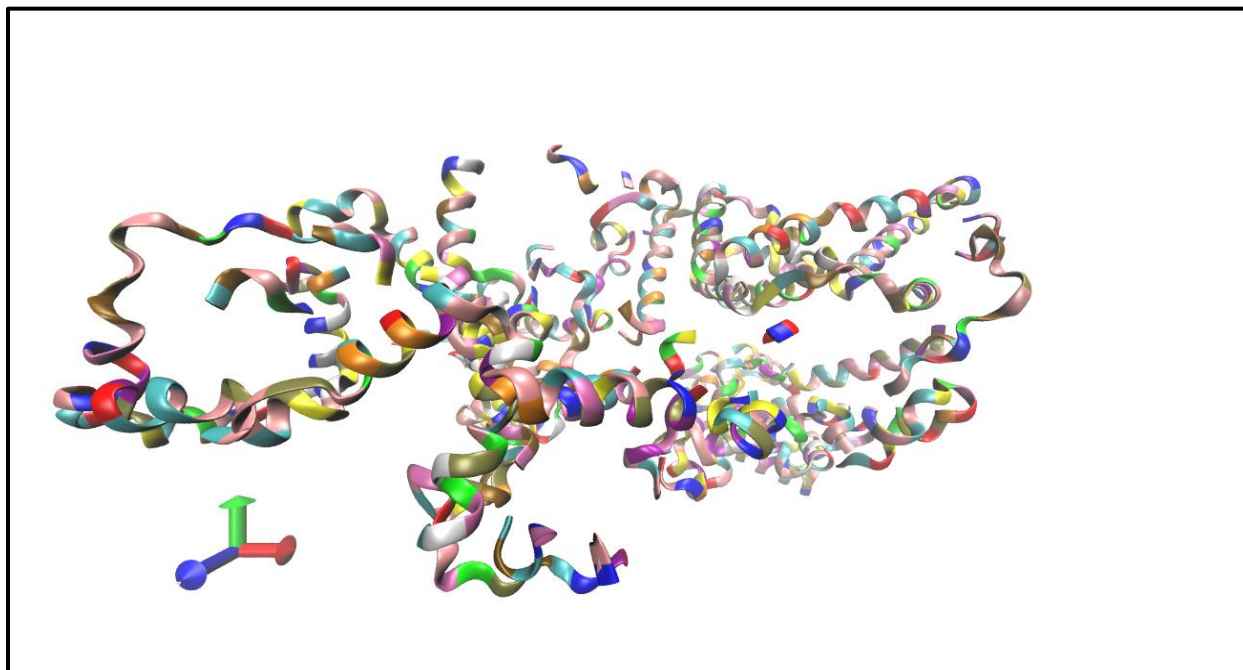

Fig S11: 3D structure of Simulated BSA at 20mM and pH 7.4

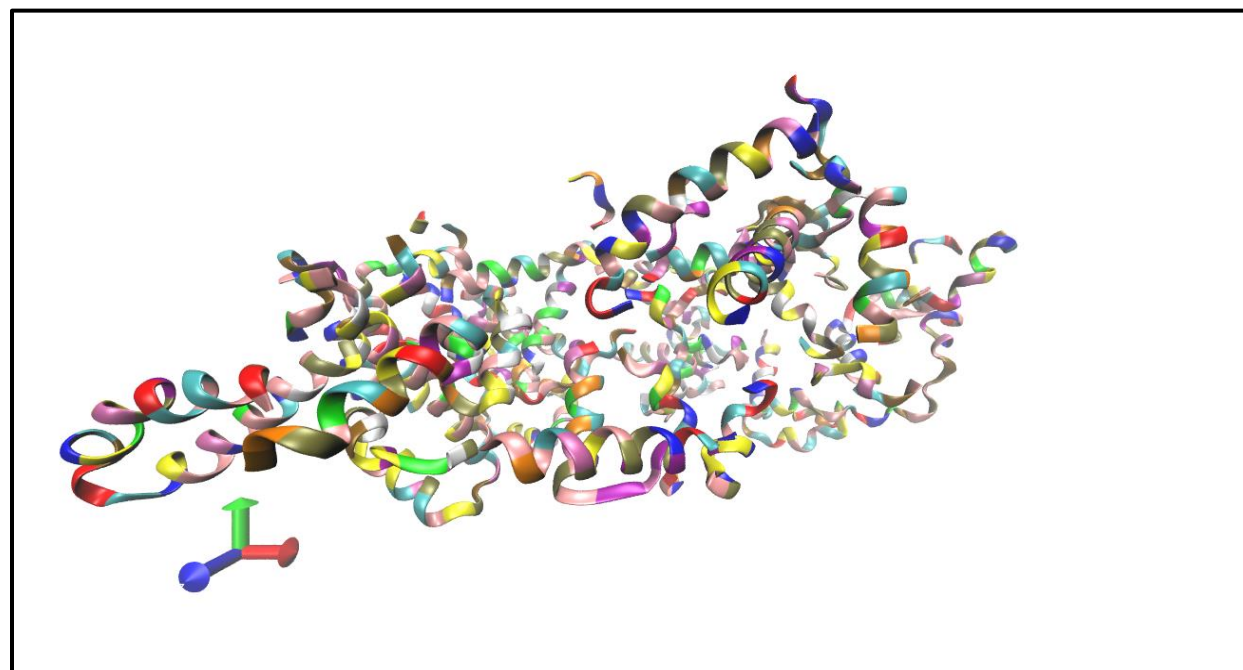

Fig S12: 3D structure of Simulated BSA at 20mM and pH 9.0

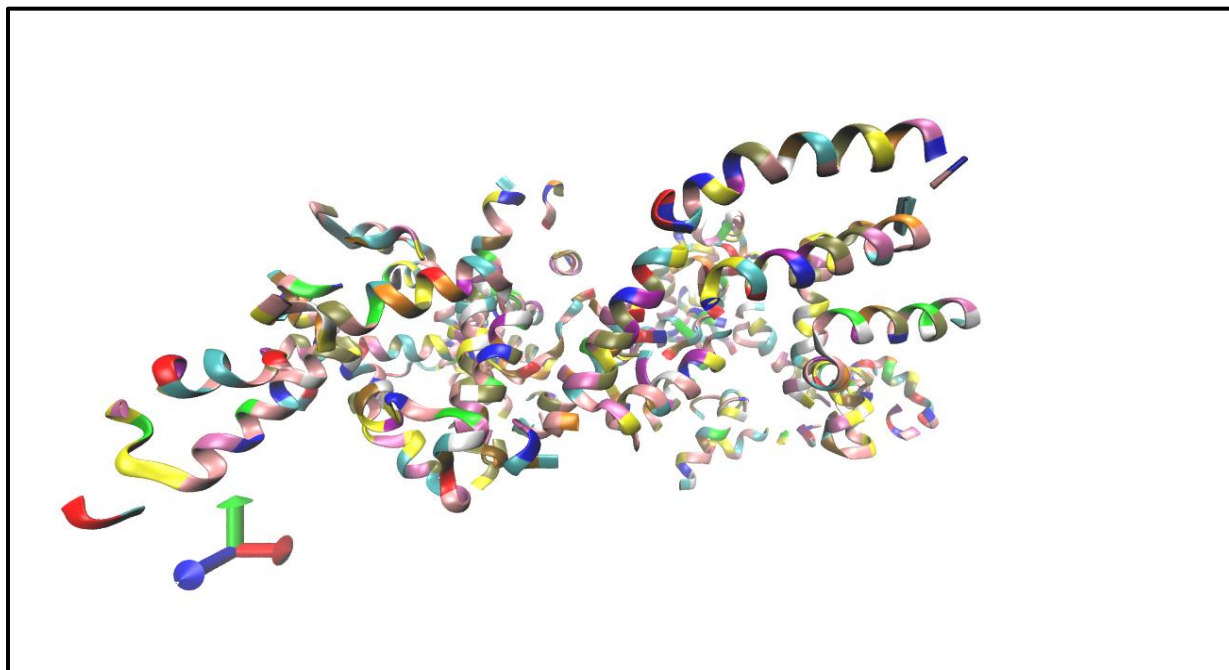

Fig S13: 3D structure of Simulated BSA at 30mM and pH 2.0

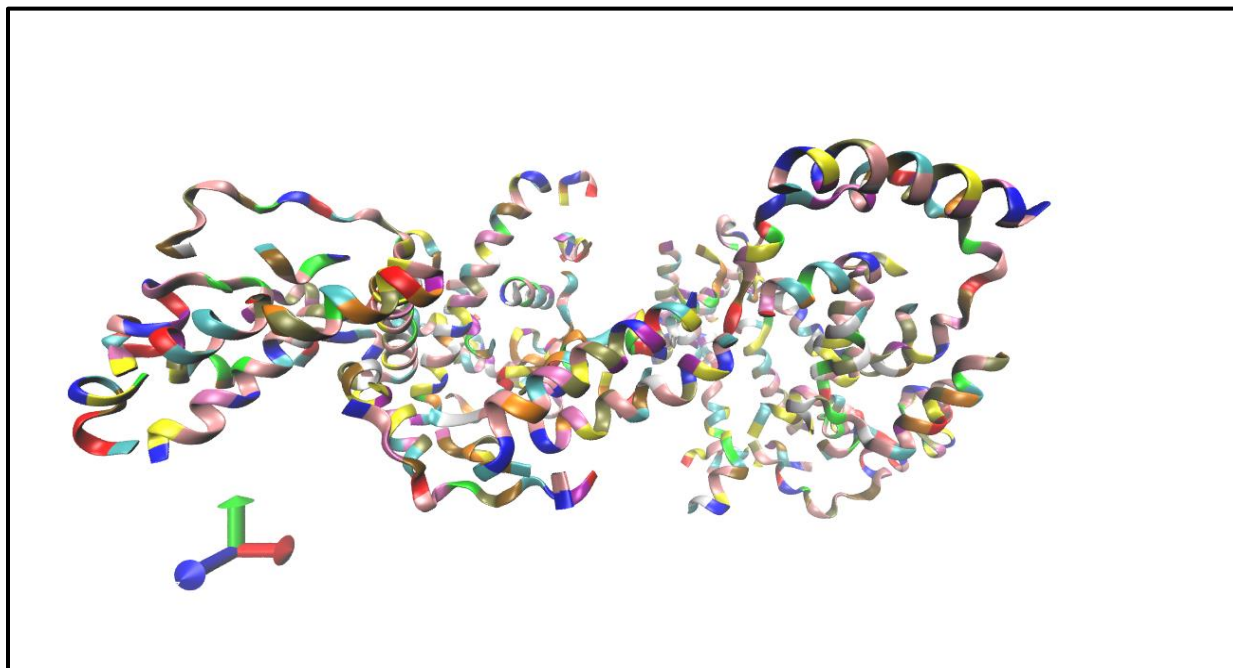

Fig S14: 3D structure of Simulated BSA at 30mM and pH 3.5

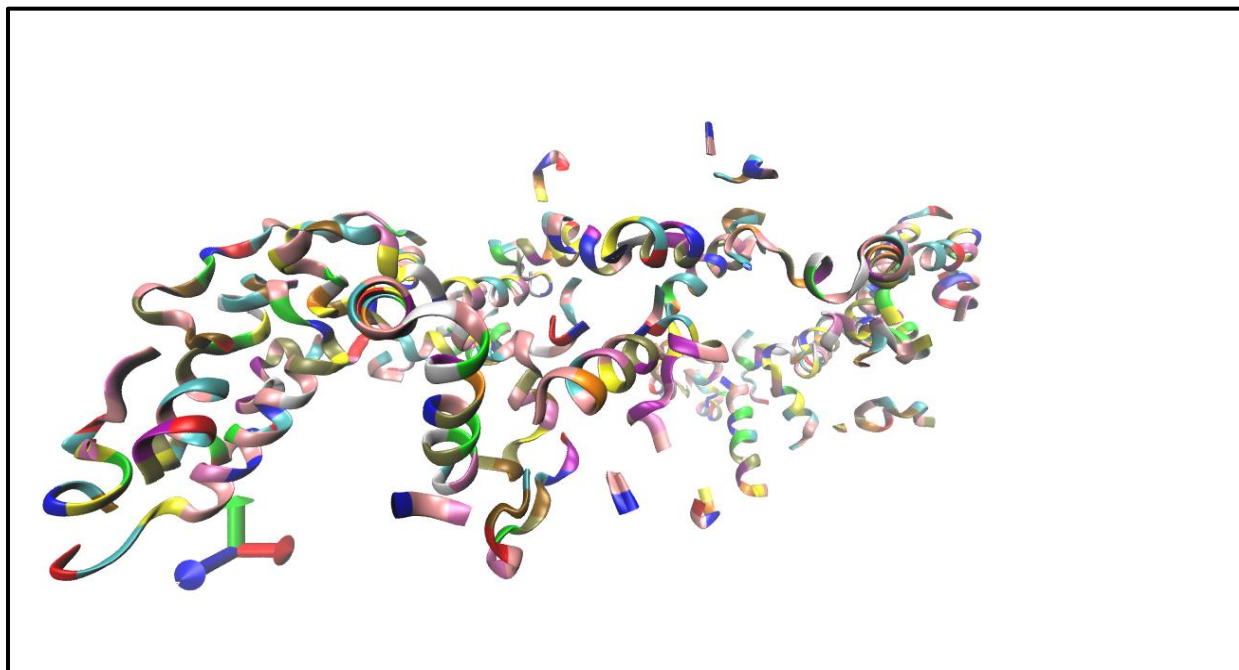

Fig S15: 3D structure of Simulated BSA at 30mM and pH 4.3

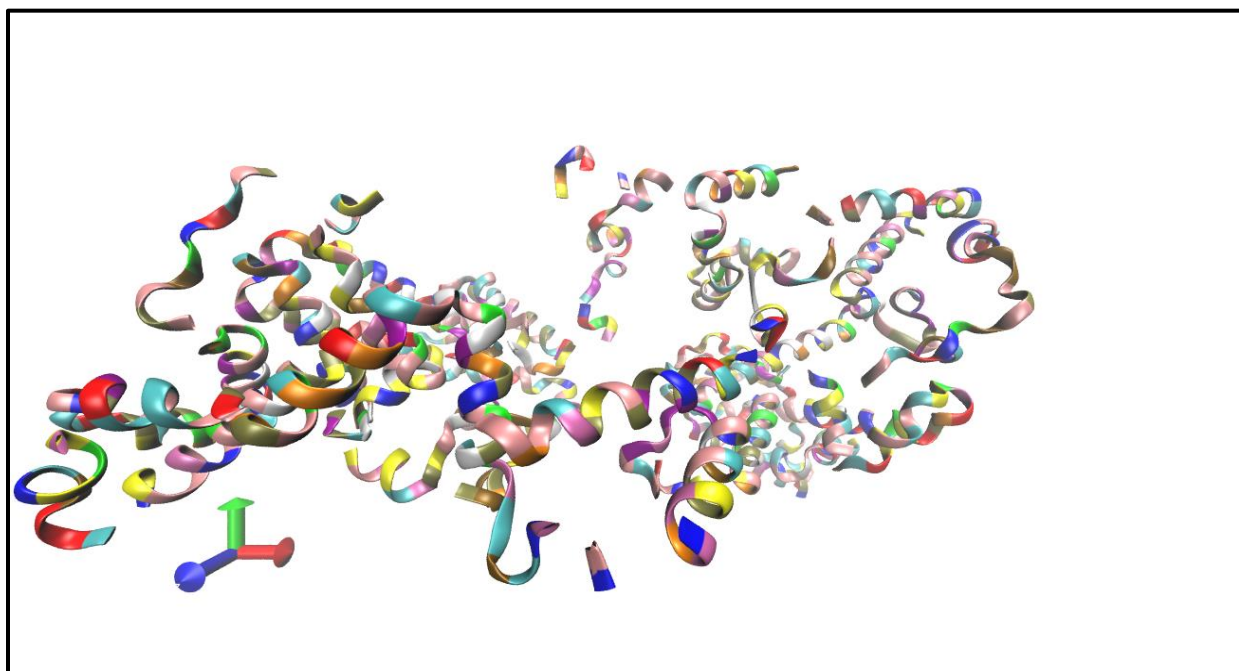



Fig S16: 3D structure of Simulated BSA at 30mM and pH 7.4

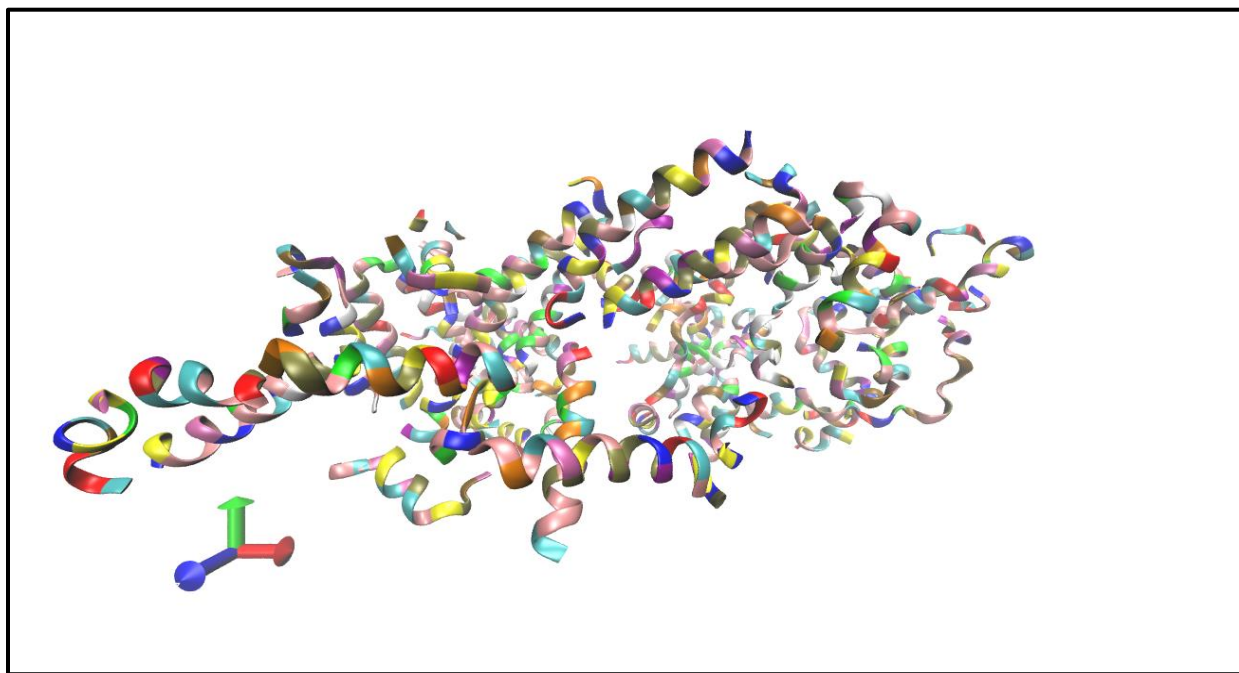

Fig S17: 3D structure of Simulated BSA at 30mM and pH 9.0

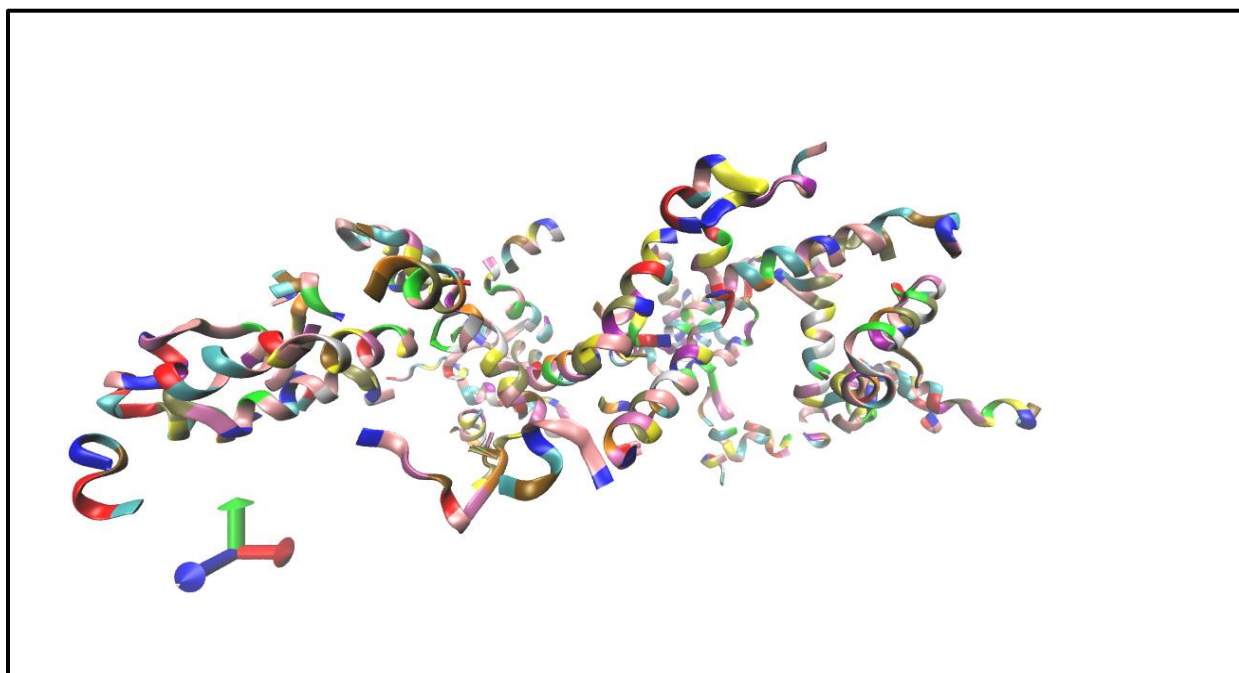

Fig S18: 3D structure of Simulated BSA at 40 mM and pH 2.0

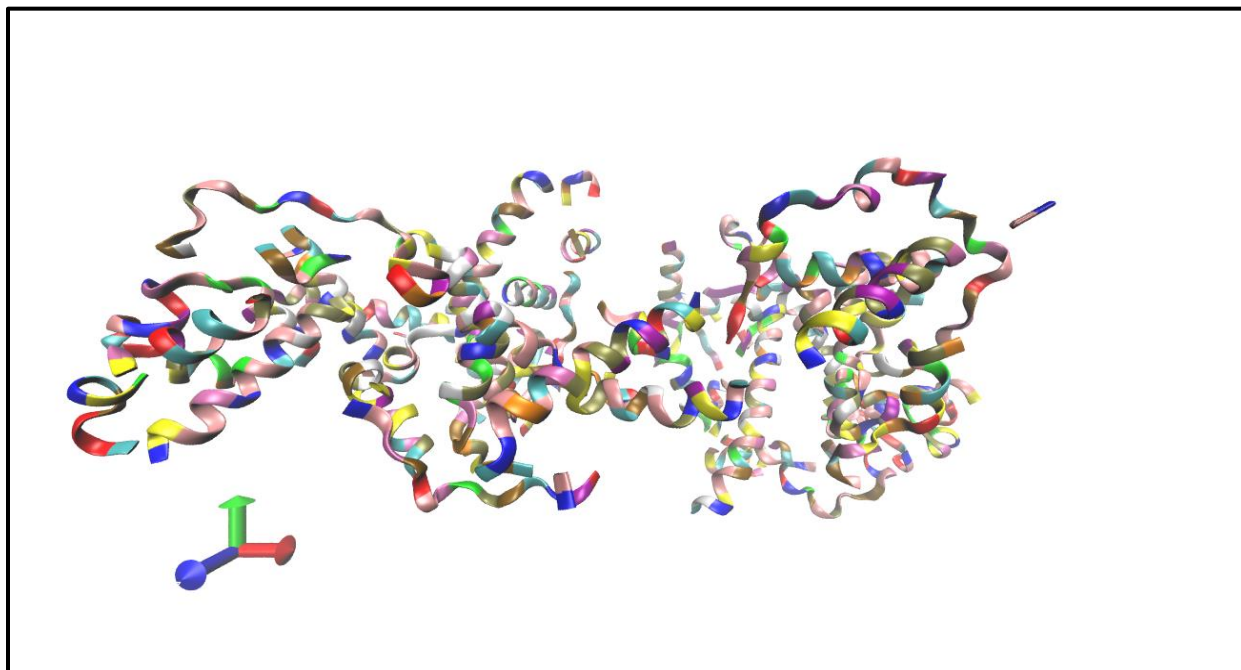

Fig S19: 3D structure of Simulated BSA at 40 mM and pH 3.5

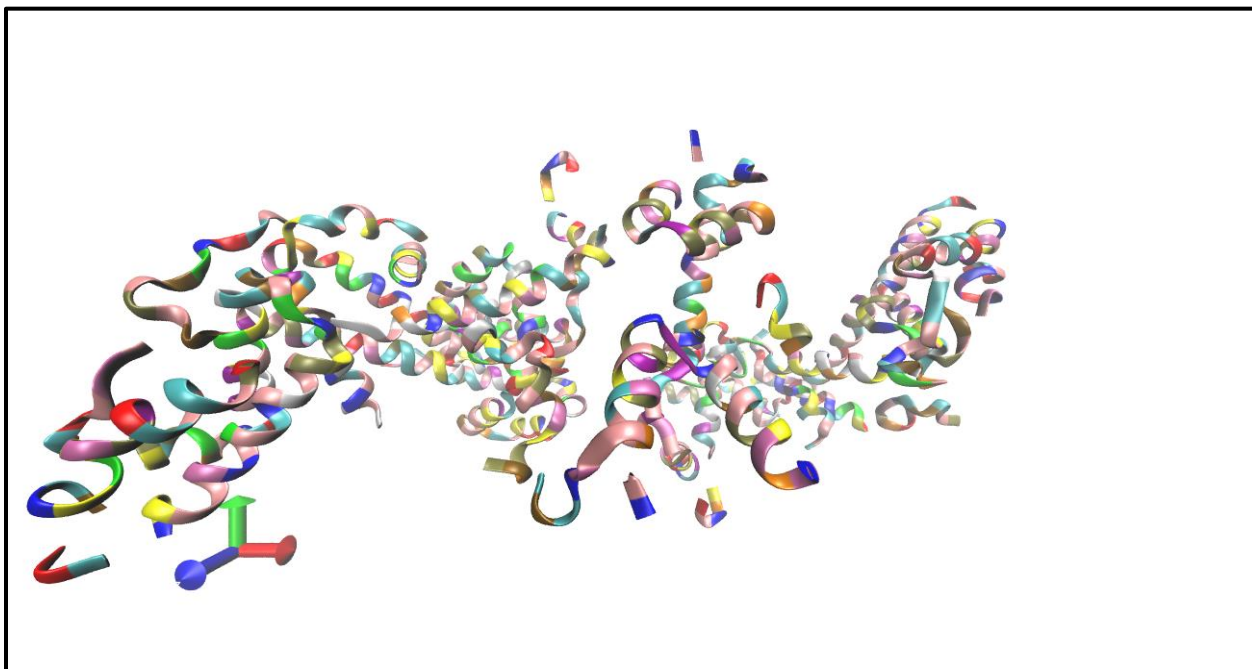

Fig S20: 3D structure of Simulated BSA at 40 mM and pH 4.3

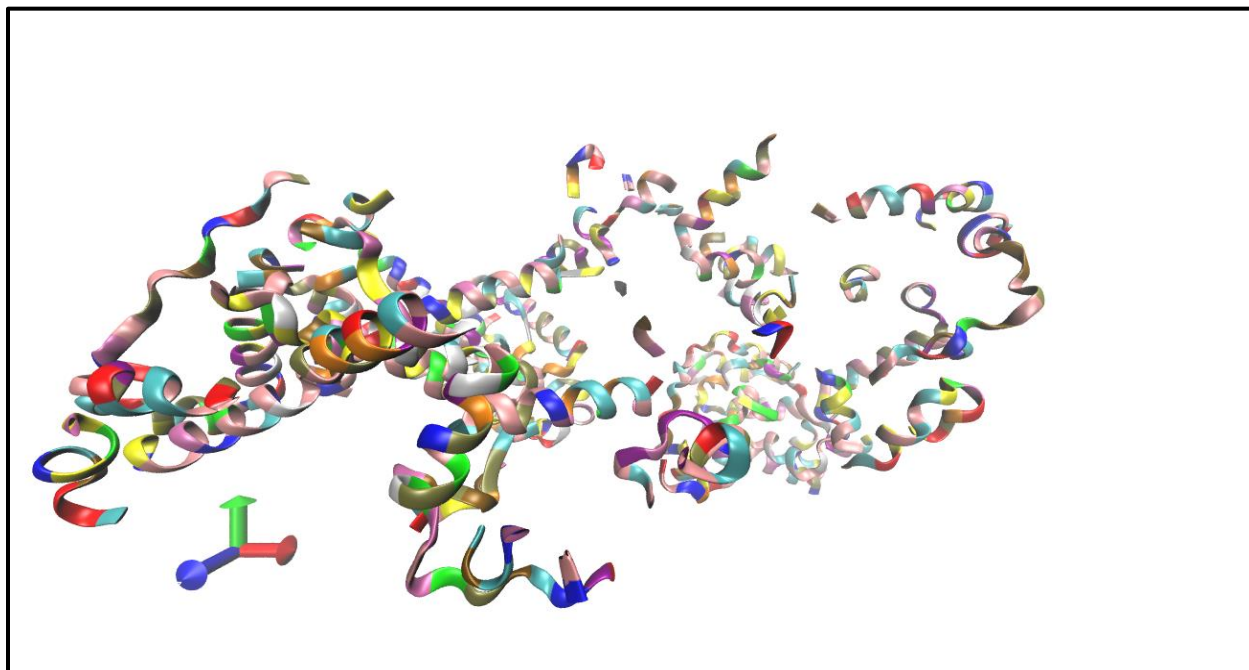

Fig S21: 3D structure of Simulated BSA at 40 mM and pH 7.4

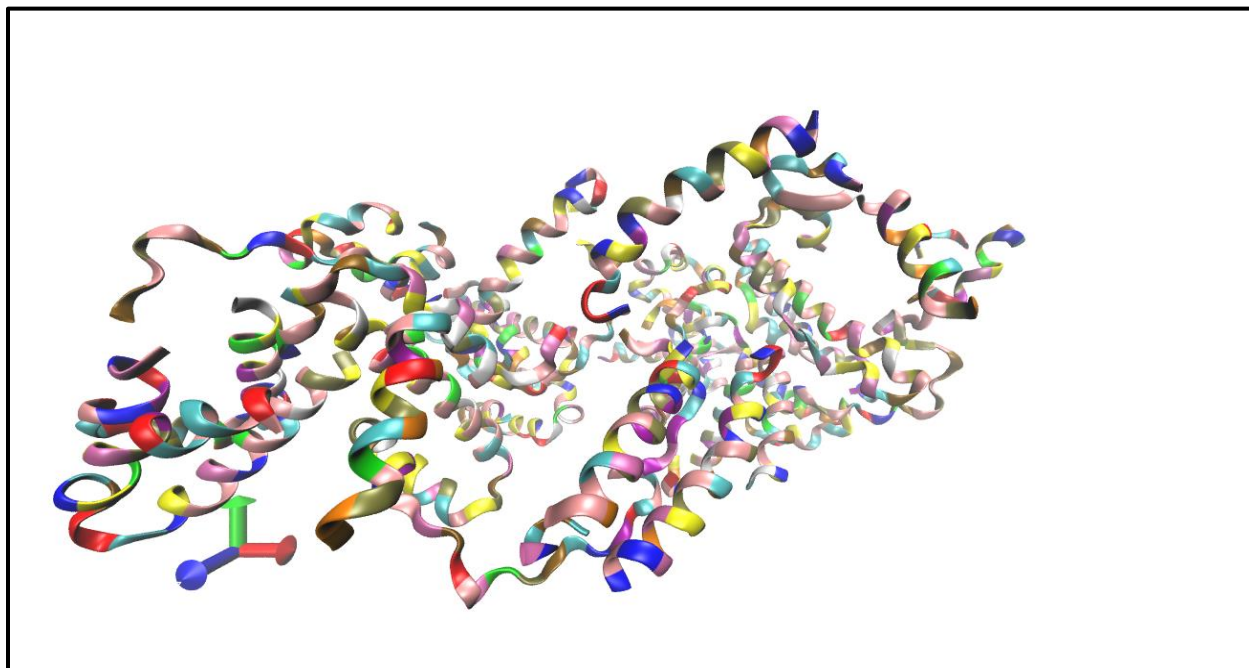

Fig S22: 3D structure of Simulated BSA at 40 mM and pH 9.0

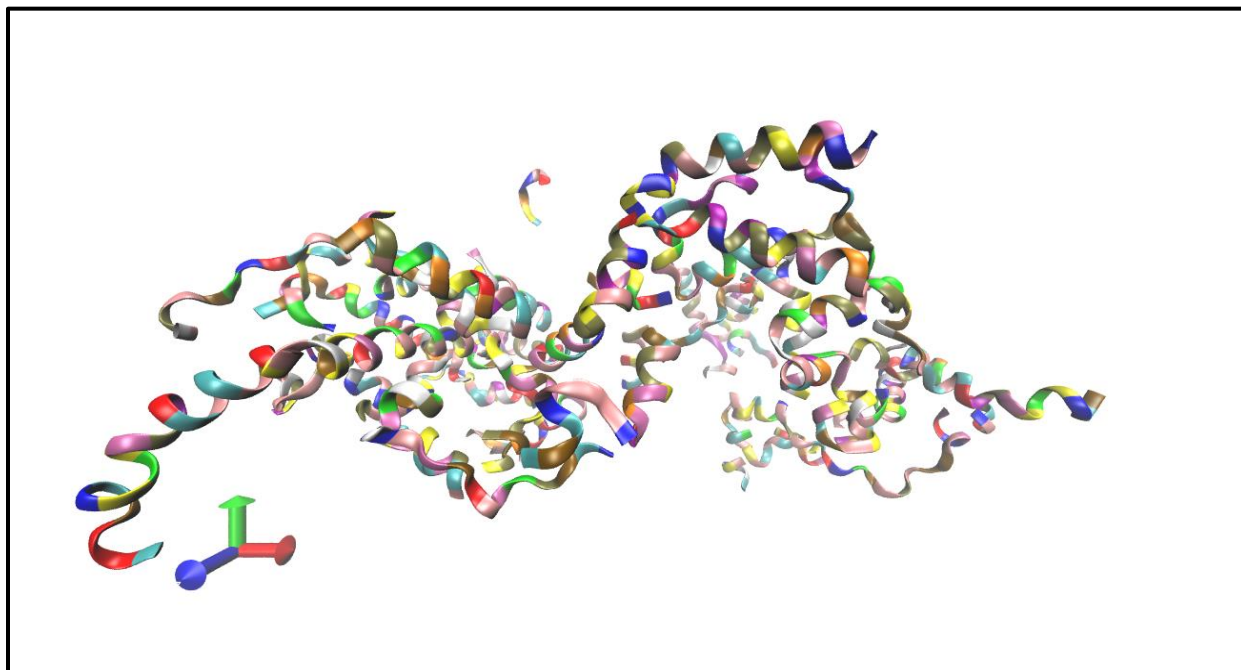

Fig S23: 3D structure of Simulated BSA at 50 mM and pH 2.0

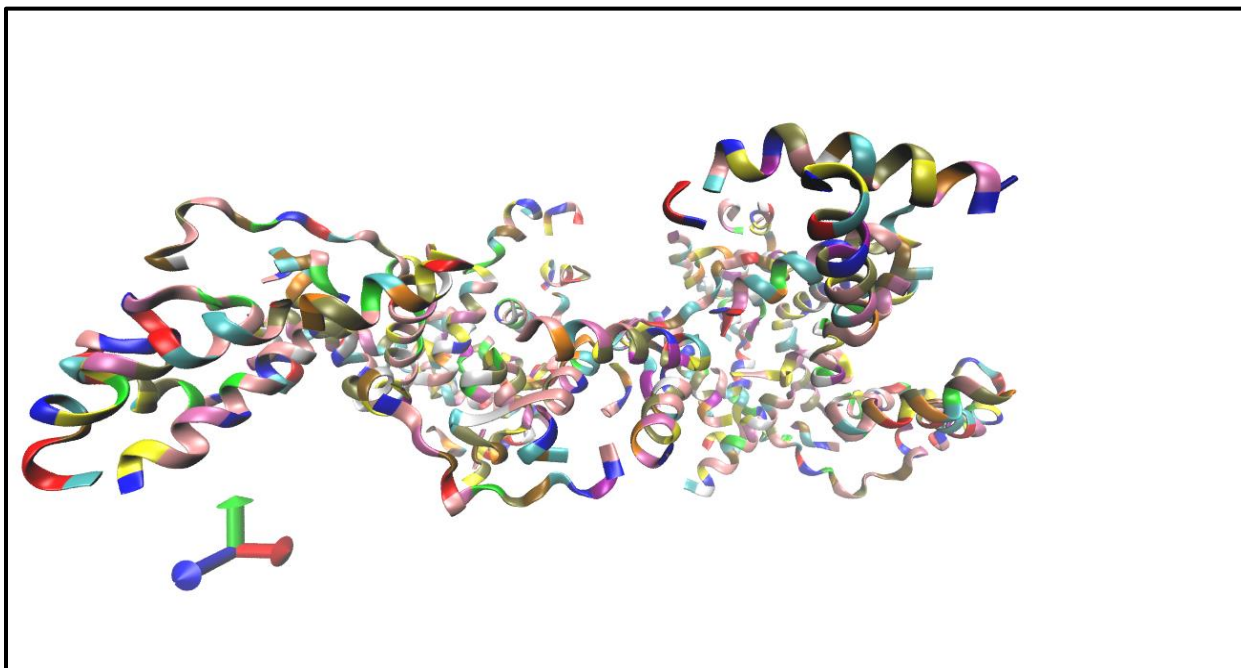



Fig S24: 3D structure of Simulated BSA at 50 mM and pH 3.5

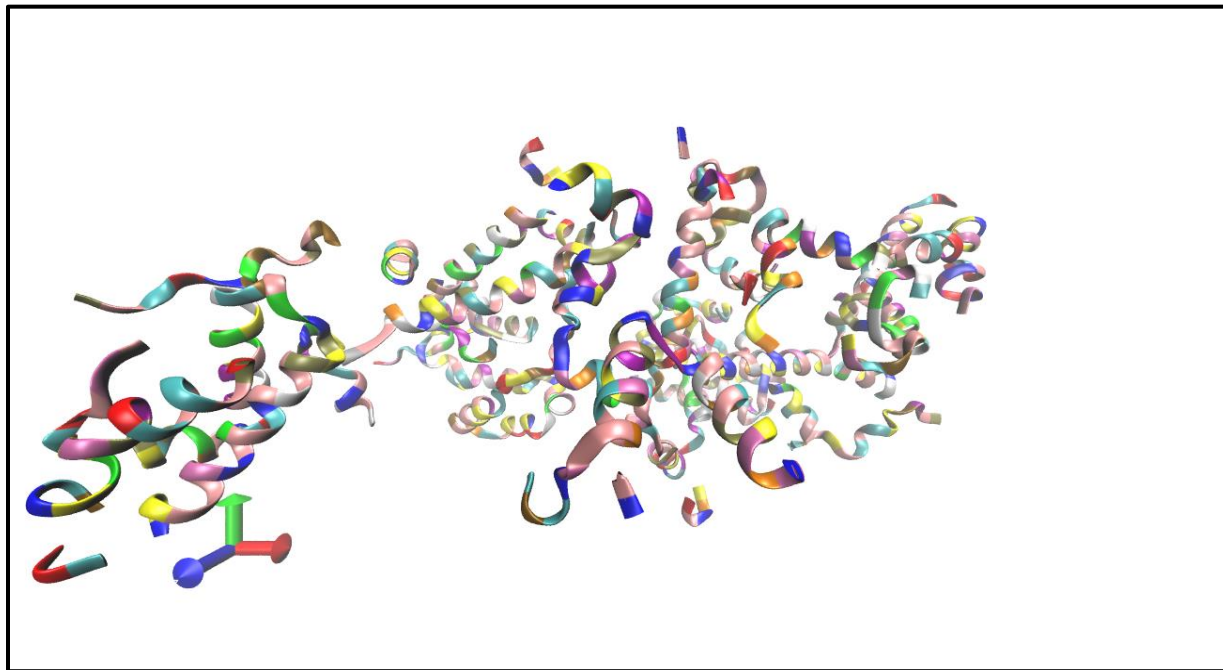

Fig S25: 3D structure of Simulated BSA at 50 mM and pH 4.3

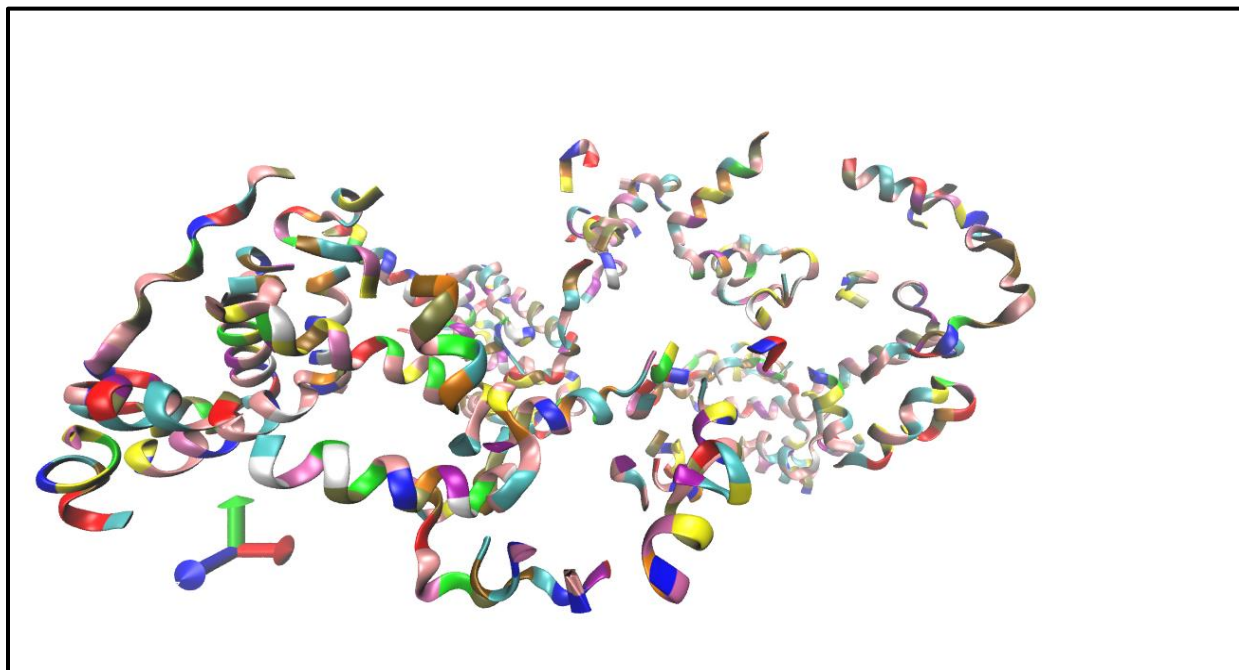



Fig S26: 3D structure of Simulated BSA at 50 mM and pH 7.4

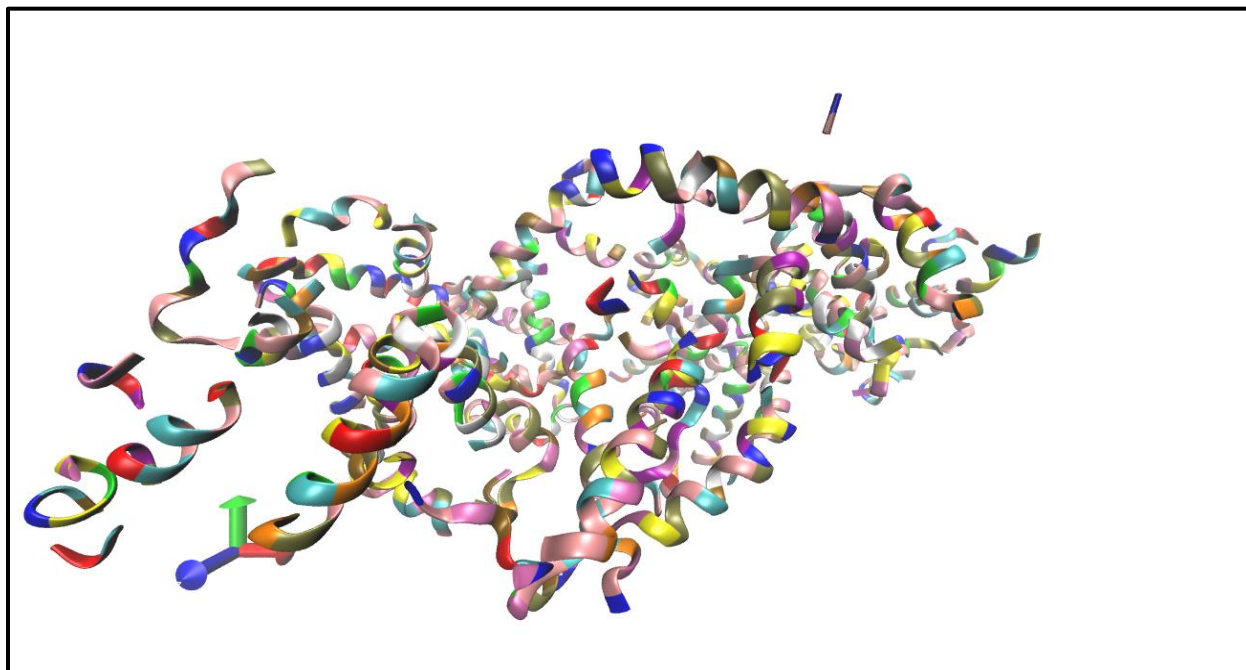

Fig S27: 3D structure of Simulated BSA at 50 mM and pH 9.0

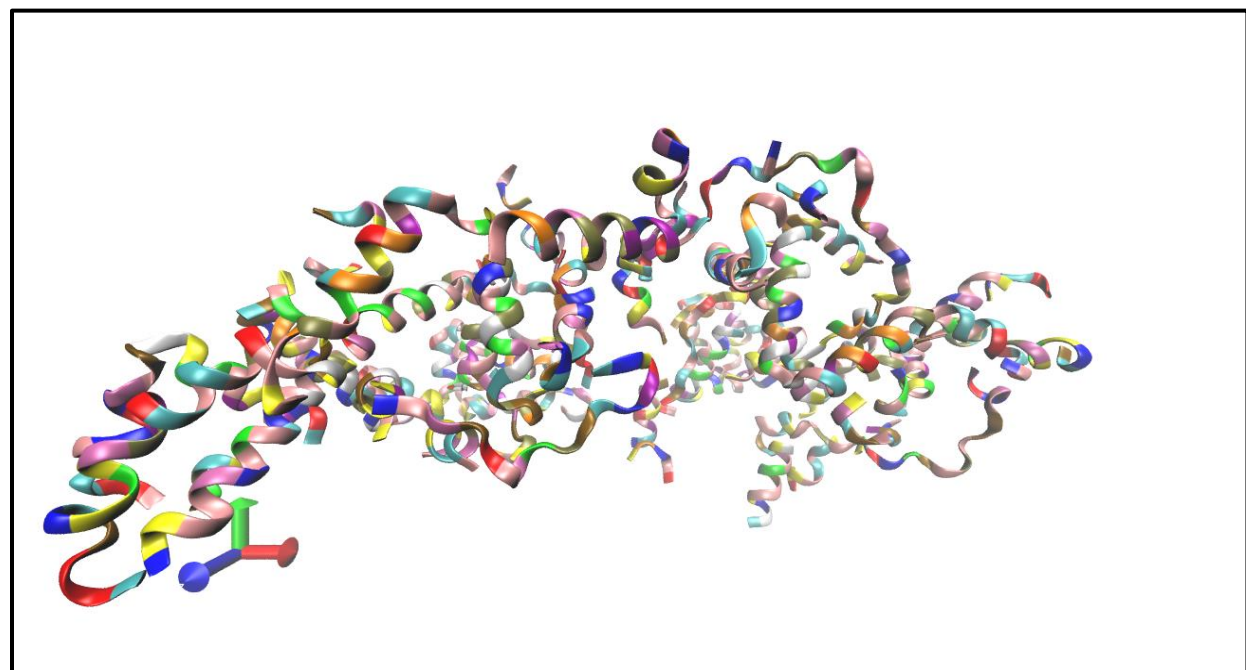

Fig S28: Ramachandran Plot of Simulated BSA at 10 mM and pH 2.0

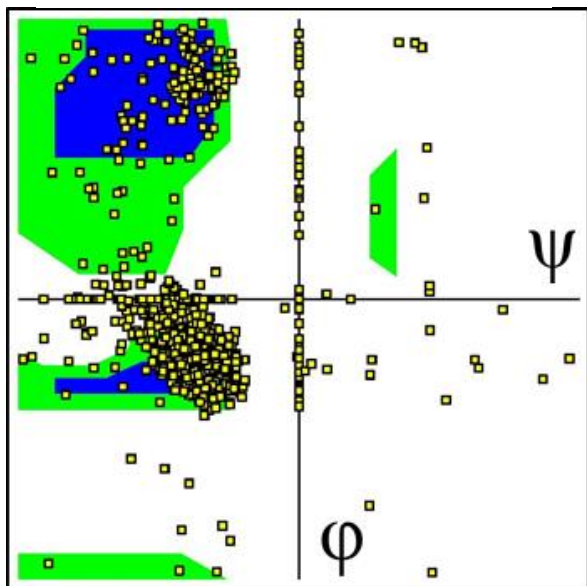

Fig S29: Ramachandran Plot of Simulated BSA at 10 mM and pH 3.5

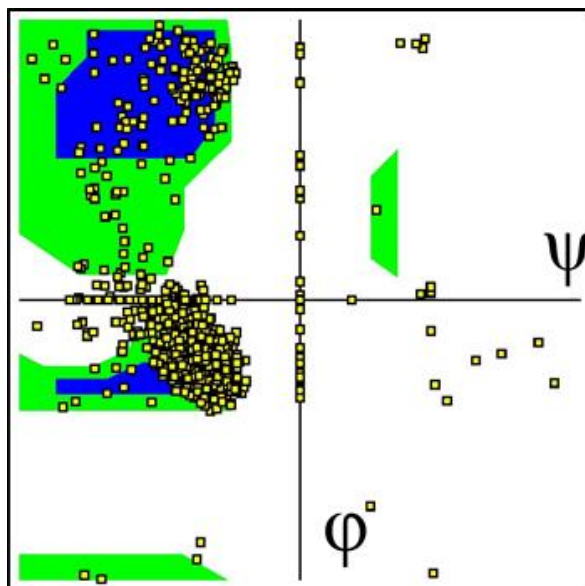

Fig S30: Ramachandran Plot of Simulated BSA at 10 mM and pH 4.3

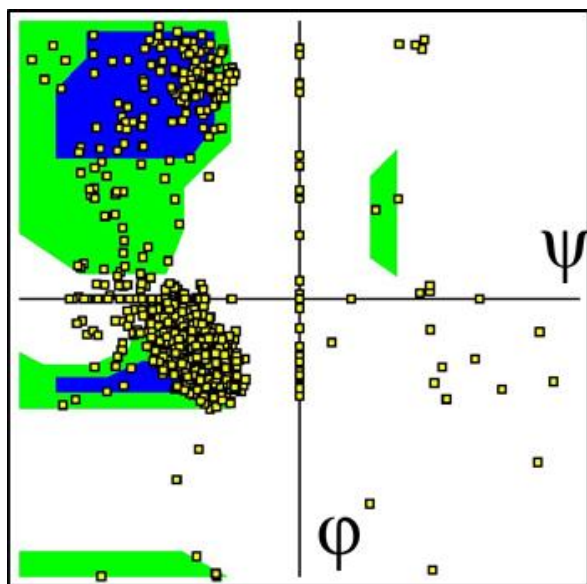

Fig S31: Ramachandran Plot of Simulated BSA at 10 mM and pH 7.4

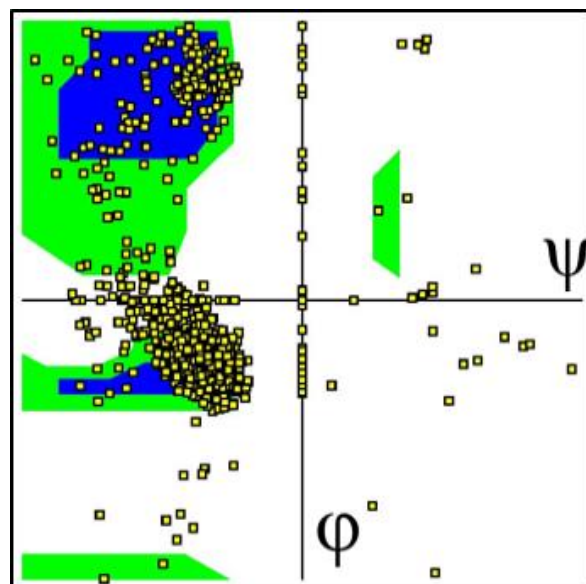

Fig S32: Ramachandran Plot of Simulated BSA at 10 mM and pH 9.0

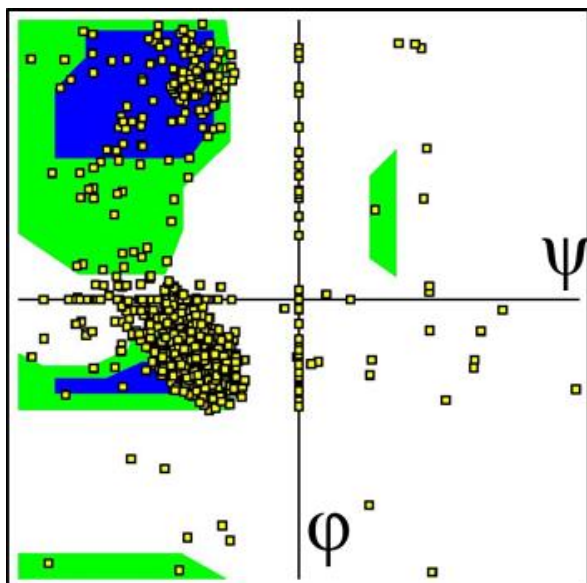

Fig S33: Ramachandran Plot of Simulated BSA at 20 mM and pH 2.0

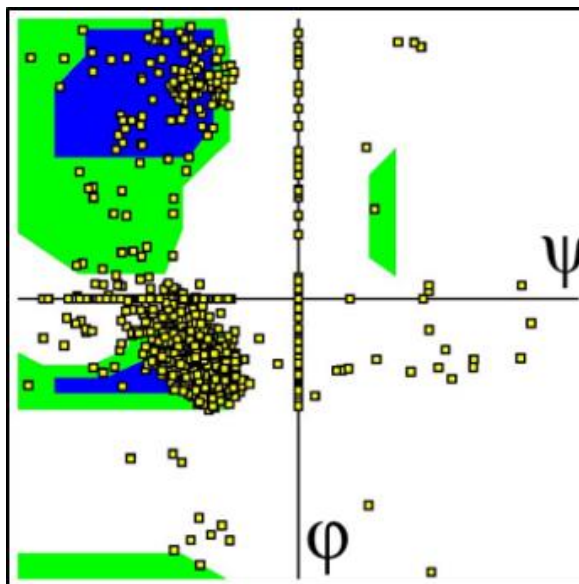

Fig S34: Ramachandran Plot of Simulated BSA at 20 mM and pH 3.5

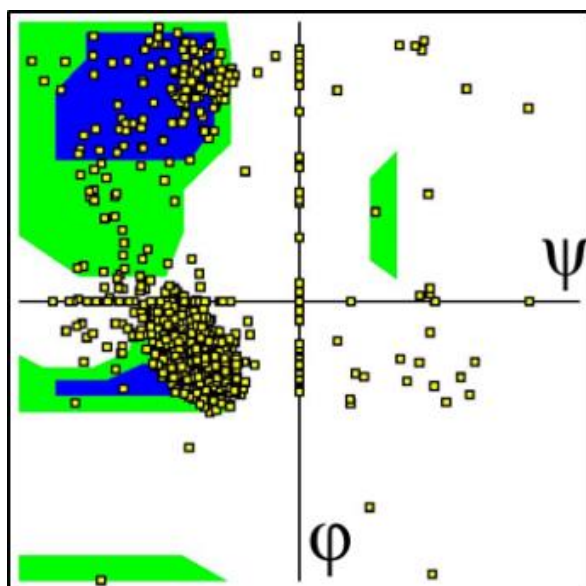

Fig S35: Ramachandran Plot of Simulated BSA at 20 mM and pH 4.3

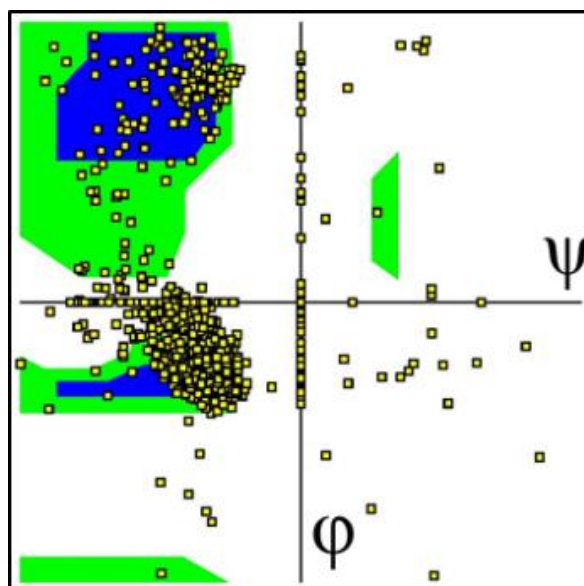

Fig S36: Ramachandran Plot of Simulated BSA at 20 mM and pH 7.4

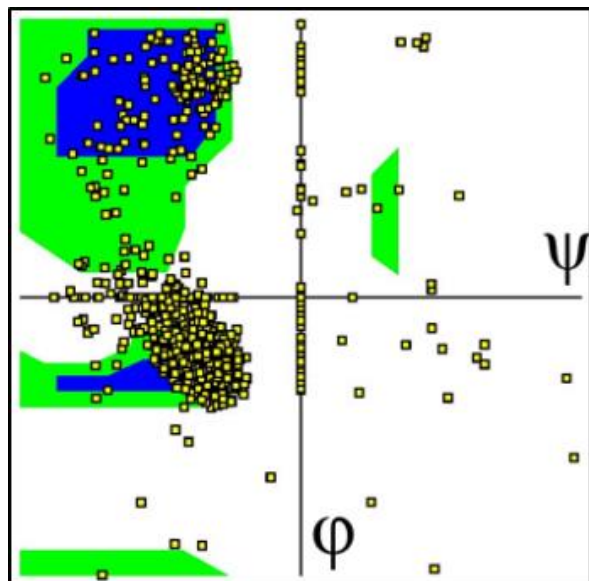

Fig S37: Ramachandran Plot of Simulated BSA at 20 mM and pH 9.0

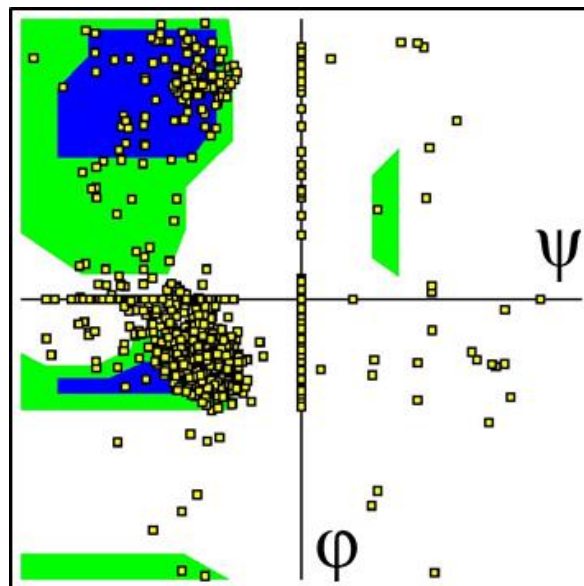

Fig S38: Ramachandran Plot of Simulated BSA at 30 mM and pH 2.0

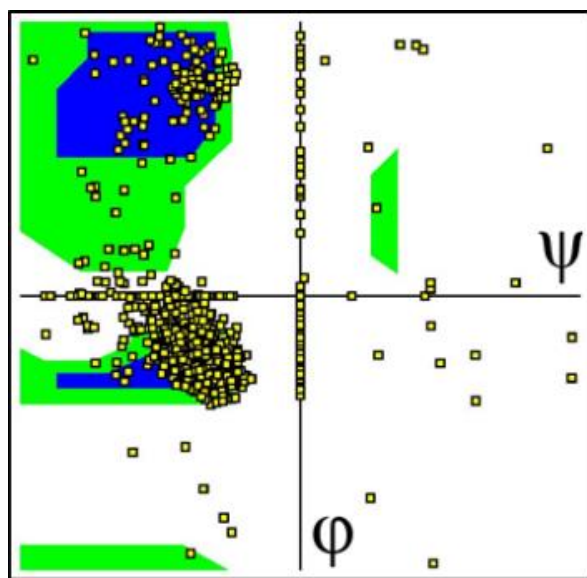

Fig S39: Ramachandran Plot of Simulated BSA at 30 mM and pH 3.5

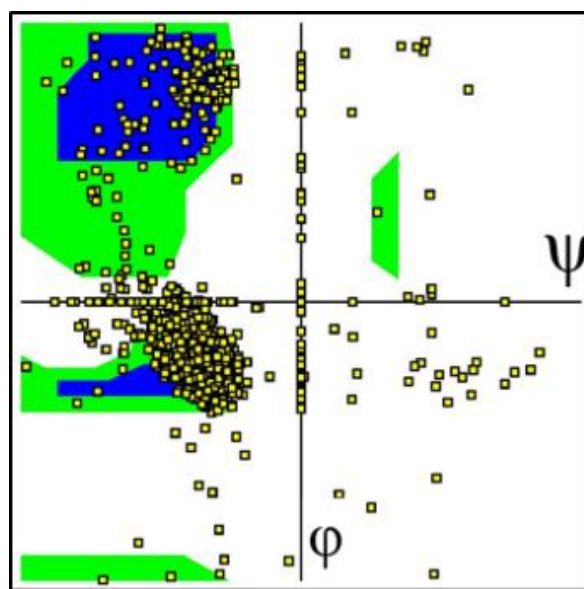



Fig S40: Ramachandran Plot of Simulated BSA at 30 mM and pH 4.3

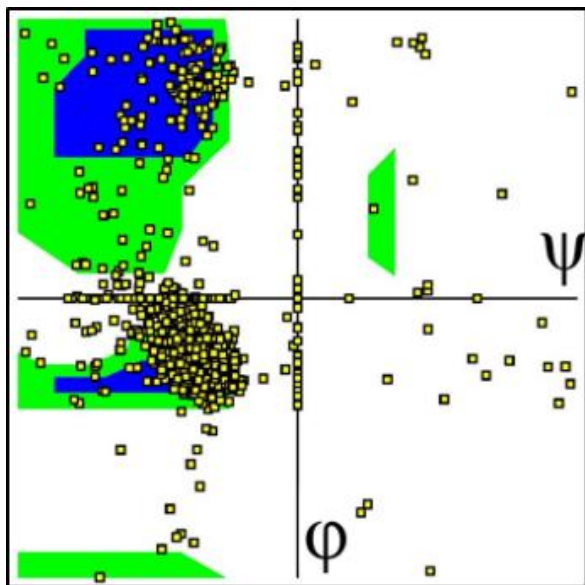

Fig S41: Ramachandran Plot of Simulated BSA at 30 mM and pH 7.4

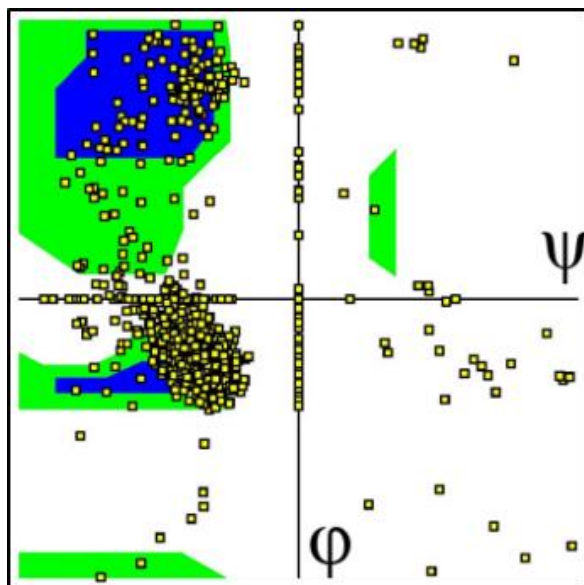

Fig S42: Ramachandran Plot of Simulated BSA at 30 mM and pH 9.0

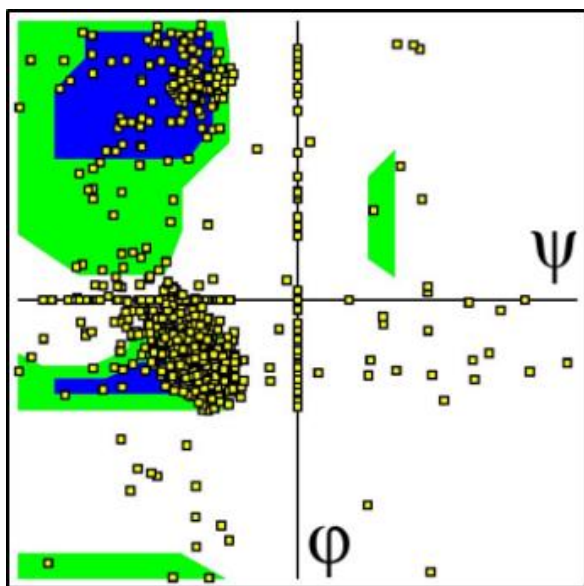

Fig S43: Ramachandran Plot of Simulated BSA at 40 mM and pH 2.0

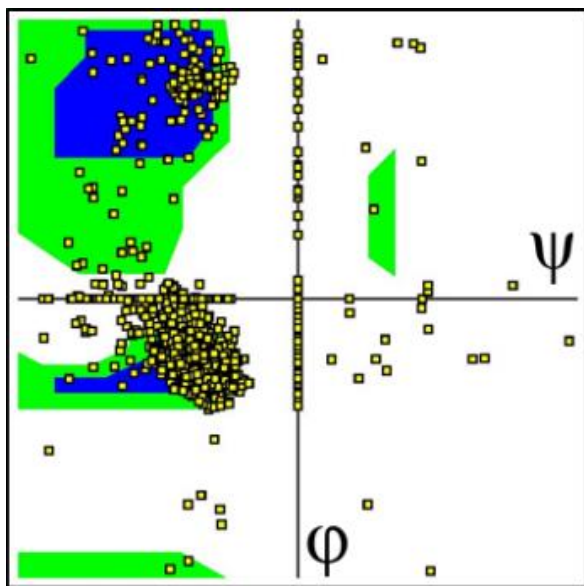



Fig S44: Ramachandran Plot of Simulated BSA at 40 mM and pH 3.5

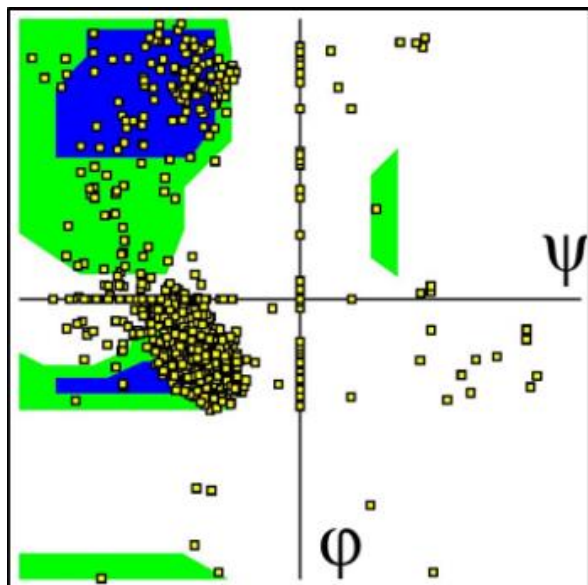

Fig S45: Ramachandran Plot of Simulated BSA at 40 mM and pH 4.3

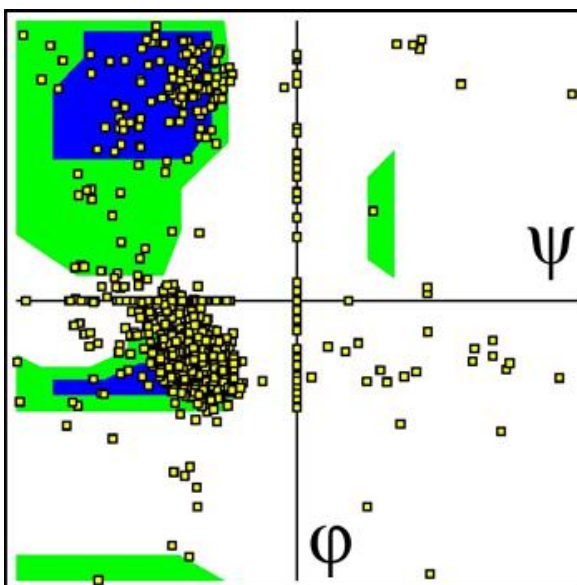

Fig S46: Ramachandran Plot of Simulated BSA at 40 mM and pH 7.4

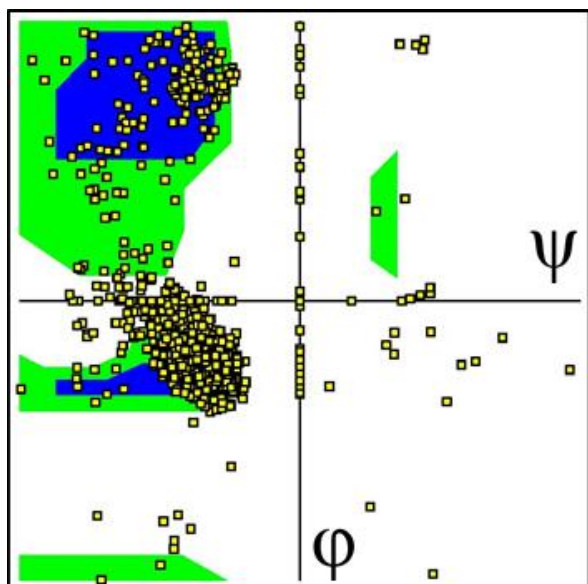

Fig S47: Ramachandran Plot of Simulated BSA at 40 mM and pH 9.0

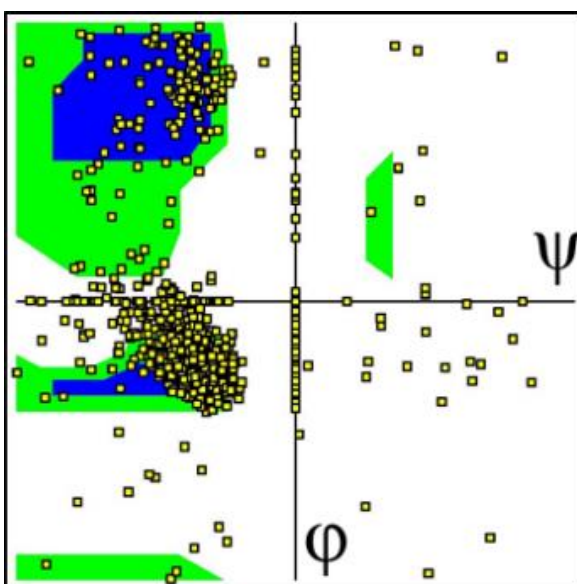

Fig S48: Ramachandran Plot of Simulated BSA at 50 mM and pH 2.0

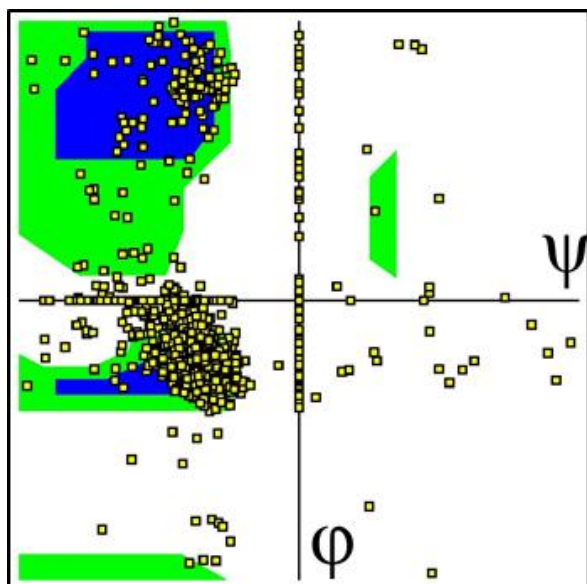

Fig S49: Ramachandran Plot of Simulated BSA at 50 mM and pH 3.5

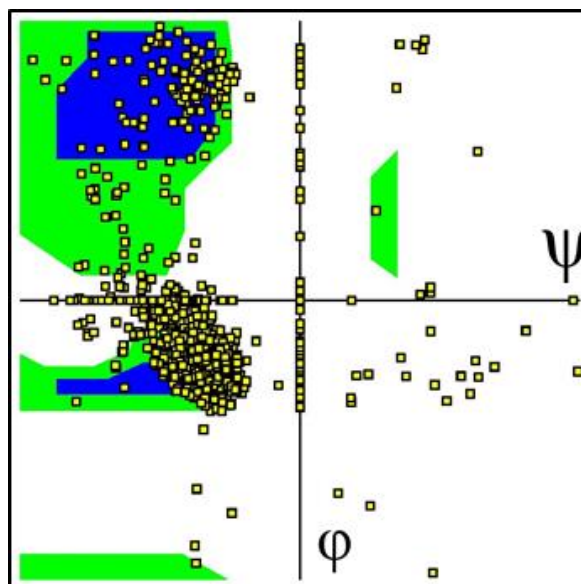

Fig S50: Ramachandran Plot of Simulated BSA at 50 mM and pH 4.3

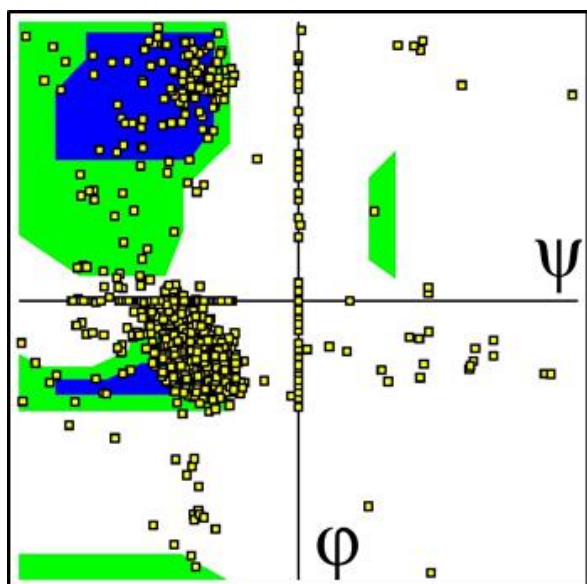

Fig S51: Ramachandran Plot of Simulated BSA at 50 mM and pH 7.4

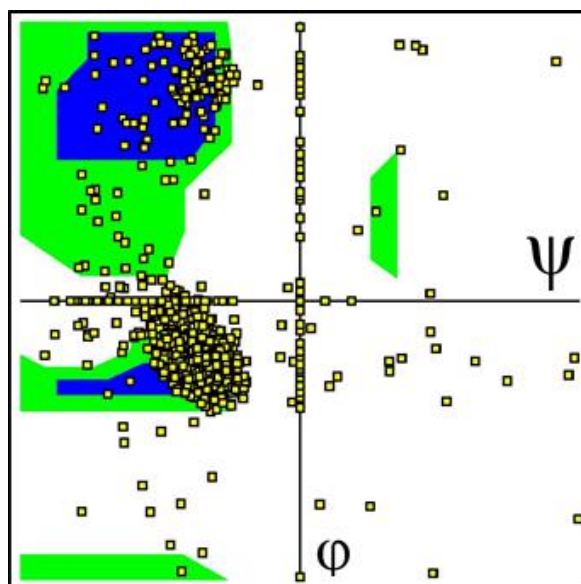

Fig S52: Ramachandran Plot of  
Simulated BSA at 50 mM and pH 9.0

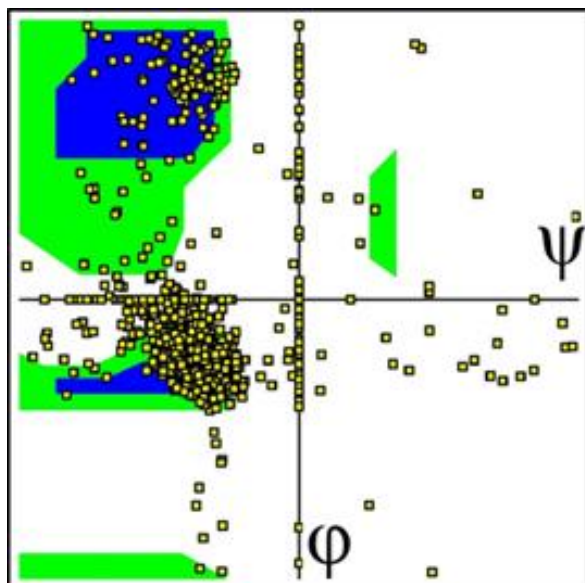

Supplement: d0ra00803f1.pdf [file d0ra00803f1.pdf]
